# Supplementary material for: AGTR1 promotes lymph node metastasis in breast cancer by upregulating CXCR4/SDF-1α and inducing cell migration and invasion
Source: publisher site journal article supplement (doi:10.18632/aging.102032), 2019-06-19
Supplement: Supplementary file [file aging-v11i12-102032-supplementary-material-SD2.pdf]

## SUPPLEMENTARY TABLE

Supplementary Table 1. Statistical table of the tissue samples and oncomine database for the lymph node-positive and lymph node-negative groups.

|                 | LN- |       |      | LN+ |      |      |
|-----------------|-----|-------|------|-----|------|------|
|                 | N   | Mean  | SD   | N   | Mean | SD   |
| <b>IHC</b>      | 148 | 1.52  | 1.03 | 127 | 2.16 | 0.56 |
| <b>Oncomine</b> | 17  | -0.88 | 0.21 | 607 | 0.12 | 0.55 |
